# Supplementary material for: Identification of resident memory CD8+ T cells with functional specificity for SARS-CoV-2 in unexposed oropharyngeal lymphoid tissue
Source: PubMed Central journal article supplement (PMC10763663; doi:10.1126/sciimmunol.abk0894), 2021-10-22
Supplement: sciimmunol.abk0894_sm.pdf [file sciimmunol.abk0894_sm.pdf]

Supplementary Materials for  
**Identification of resident memory CD8<sup>+</sup> T cells with functional specificity for  
SARS-CoV-2 in unexposed oropharyngeal lymphoid tissue**

Julia Niessl *et al.*

Corresponding author: Julia Niessl, [julia.niessl@ki.se](mailto:julia.niessl@ki.se); Marcus Buggert, [marcus.buggert@ki.se](mailto:marcus.buggert@ki.se)

*Sci. Immunol.* **6**, eabk0894 (2021)  
DOI: 10.1126/sciimmunol.abk0894

**The PDF file includes:**

Figs. S1 to S7  
Tables S1 to S4

**Other Supplementary Material for this manuscript includes the following:**

Table S5

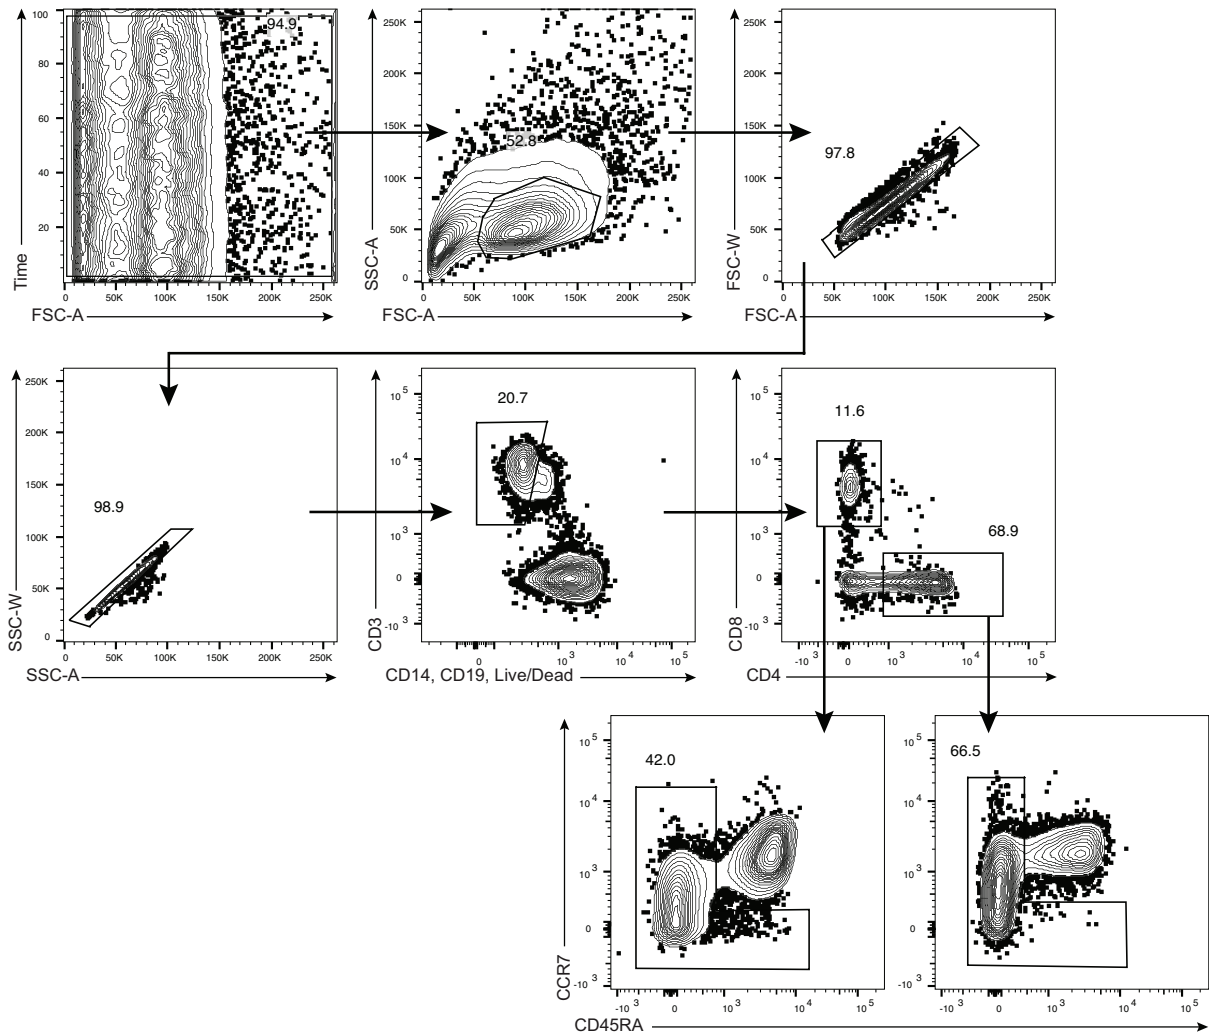

**Figure S1. Flow cytometric gating strategy for the identification of mCD4<sup>+</sup> and mCD8<sup>+</sup> T cells.**

Numbers indicate percentages in the drawn gates.

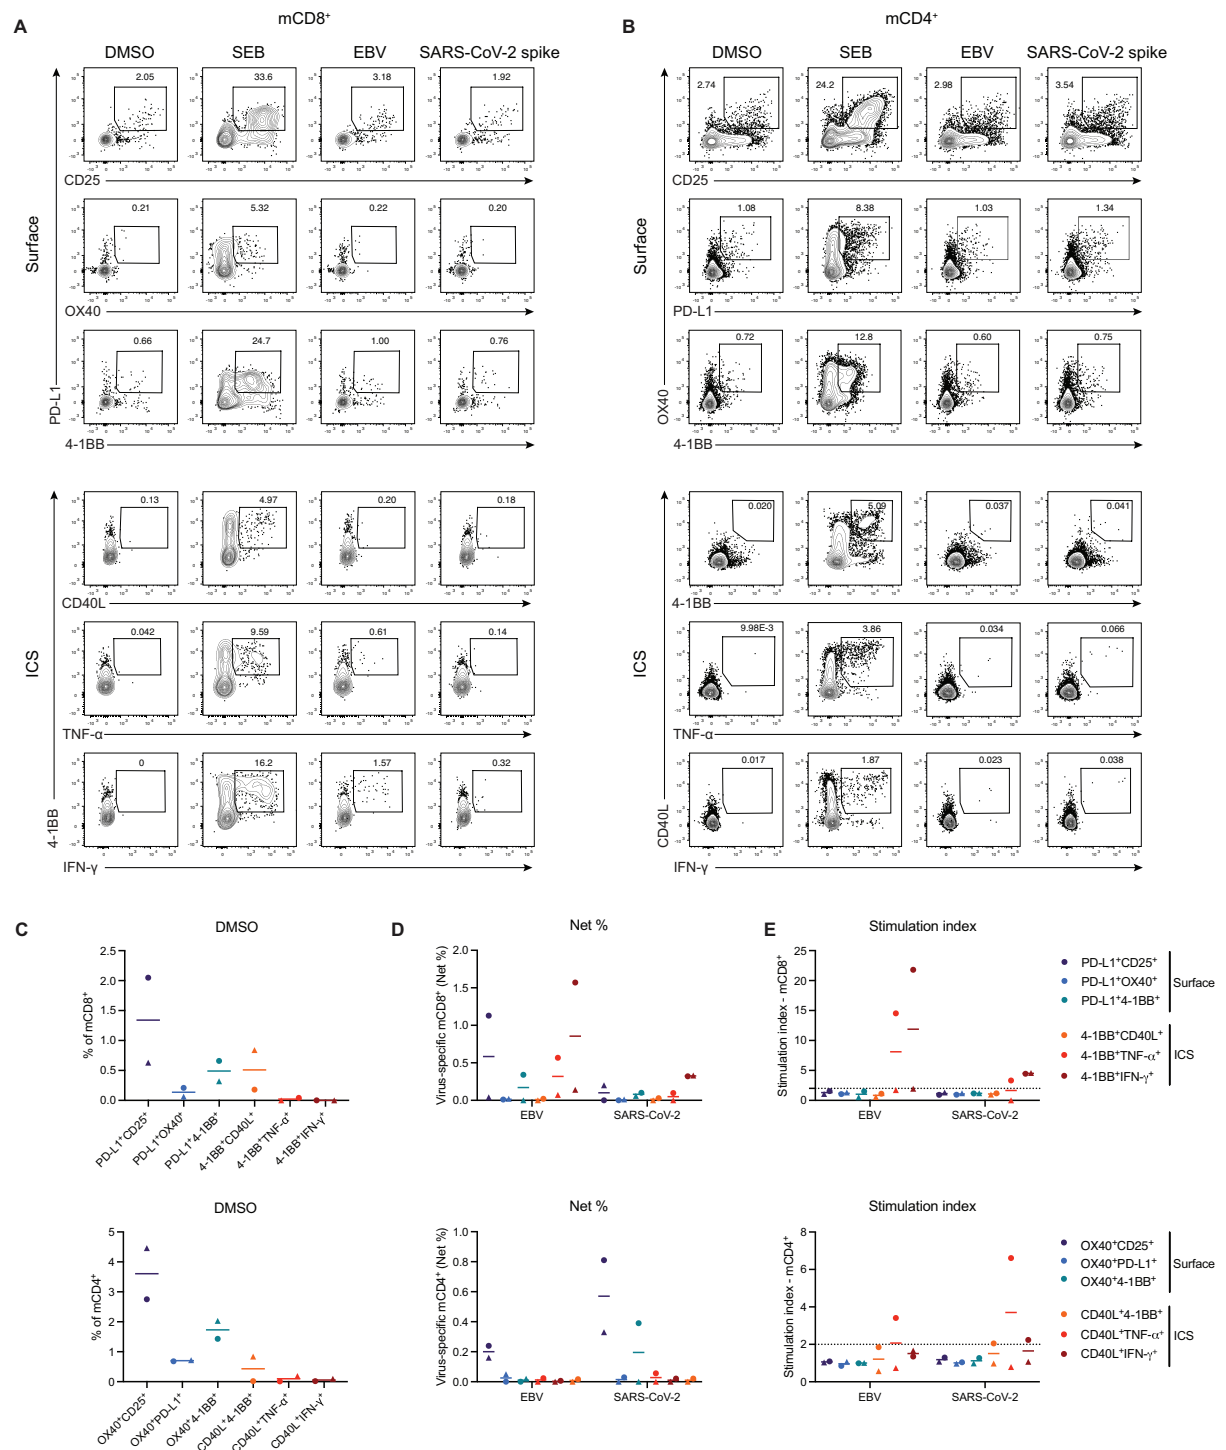

**Figure S2. Assessment of activation-induced markers and cytokines for the detection of virus-specific tonsillar mCD4<sup>+</sup> and mCD8<sup>+</sup> T cells.**

Tonsil cells were stimulated with the indicated peptides or SEB and analyzed for surface expression of activation-induced markers (AIMs) or intracellular expression of AIMs and cytokines (ICS). Negative control wells contained equivalent DMSO. (**A**, **B**) Representative

plots showing the expression profile of surface AIMS (top) and intracellular AIMS/cytokines (bottom) for tonsillar mCD8<sup>+</sup> (A) or mCD4<sup>+</sup> T cells (B). (C) Frequencies of mCD8<sup>+</sup> (top) or mCD4<sup>+</sup> T cells (bottom) expressing the indicated markers in the absence of stimulation. (D) Net frequencies (background subtracted) of virus-specific mCD8<sup>+</sup> (top) or mCD4<sup>+</sup> T cells (bottom) identified by different marker combinations. (E) Stimulation indices for virus-specific mCD8<sup>+</sup> (top) or mCD4<sup>+</sup> T cells (bottom) calculated as fold change relative to the negative control. The dotted line indicates a stimulation index of 2. (C to E) Symbols represent different individuals (n = 2).

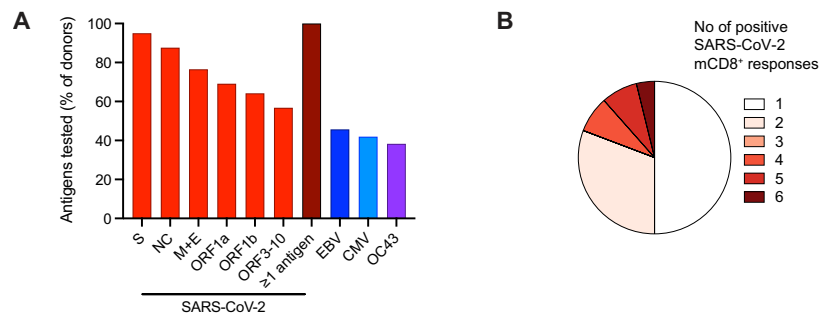

**Figure S3. Evaluation of SARS-CoV-2-specific mCD8<sup>+</sup> T cell responses**

(A) Overall frequency of tonsil samples tested with individual peptide pools. n = 81. (B) Overall number of antigens recognized in the same tonsil sample pooled for all donors with positive mCD8<sup>+</sup> T cell responses against at least one antigen derived from SARS-CoV-2. n = 26 (only tonsil samples, for which all 6 SARS-CoV-2 antigens were tested, are included).

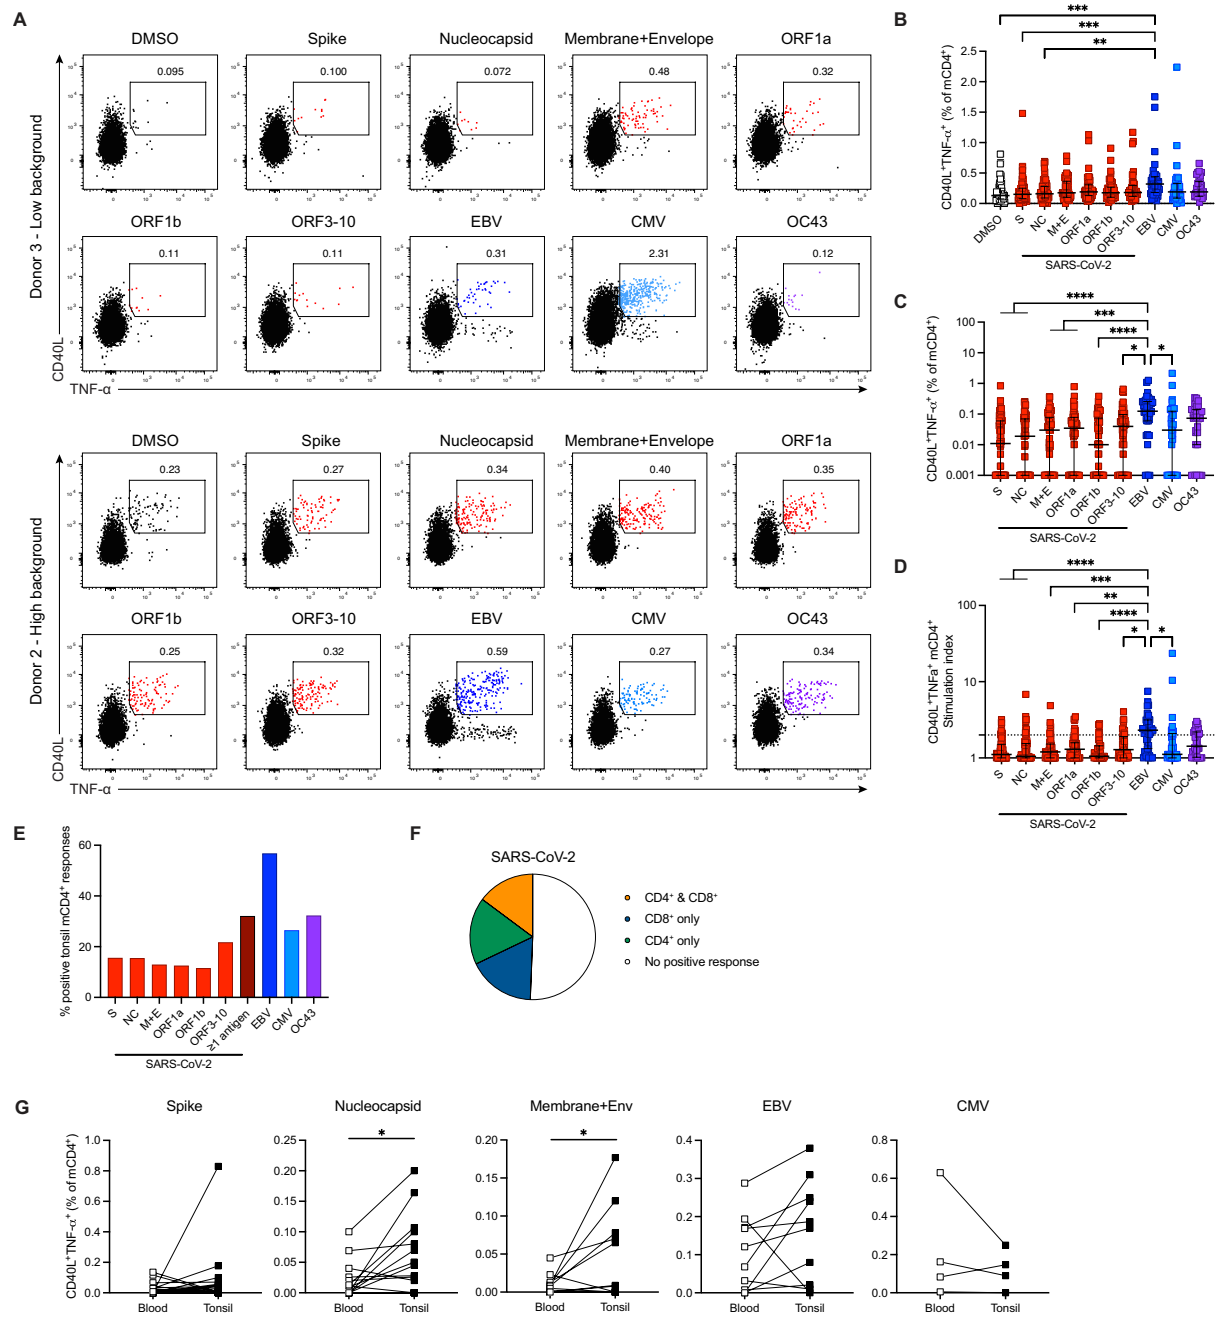

**Figure S4. Identification of tonsillar mCD4<sup>+</sup> T cells specific for SARS-CoV-2 in unexposed individuals.**

Tonsil cells were stimulated with the indicated peptides and analyzed for intracellular coexpression of CD40L and TNF- $\alpha$ . **(A)** Representative plots showing the gating of CD40L<sup>+</sup>TNF- $\alpha$ <sup>+</sup> mCD4<sup>+</sup> T cells from individuals with low (top) or high background levels of activation (bottom). **(B)** Frequencies of CD40L<sup>+</sup>TNF- $\alpha$ <sup>+</sup> mCD4<sup>+</sup> T cells. **(C)** Net frequencies (background subtracted) of CD40L<sup>+</sup>TNF- $\alpha$ <sup>+</sup> mCD4<sup>+</sup> T cells. **(D)** Stimulation indices for

CD40L<sup>+</sup>TNF- $\alpha$ <sup>+</sup> mCD4<sup>+</sup> T cells calculated as fold change relative to the negative control. The dotted line indicates a stimulation index of 2. **(E)** Overall frequency of tonsil samples with positive mCD4<sup>+</sup> T cell responses (stimulation index  $\geq 2$ ) to the indicated antigens. **(F)** Overall frequency of tonsil samples with positive mCD4<sup>+</sup> and/or mCD8<sup>+</sup> T cell responses (stimulation index  $\geq 2$ ) to SARS-CoV-2. **(G)** Frequencies of CD40L<sup>+</sup>TNF- $\alpha$ <sup>+</sup> mCD4<sup>+</sup> T cells in matched blood and tonsil samples. (B–E) S, spike; NC, nucleocapsid; M+E, membrane+envelope. (B–D) Graphs show median  $\pm$  IQR. Kruskal-Wallis test with Dunn's posttest. (G) Wilcoxon signed rank test. \* $P < 0.05$ ; \*\* $P < 0.01$ ; \*\*\* $P < 0.001$ ; \*\*\*\* $P < 0.0001$ .

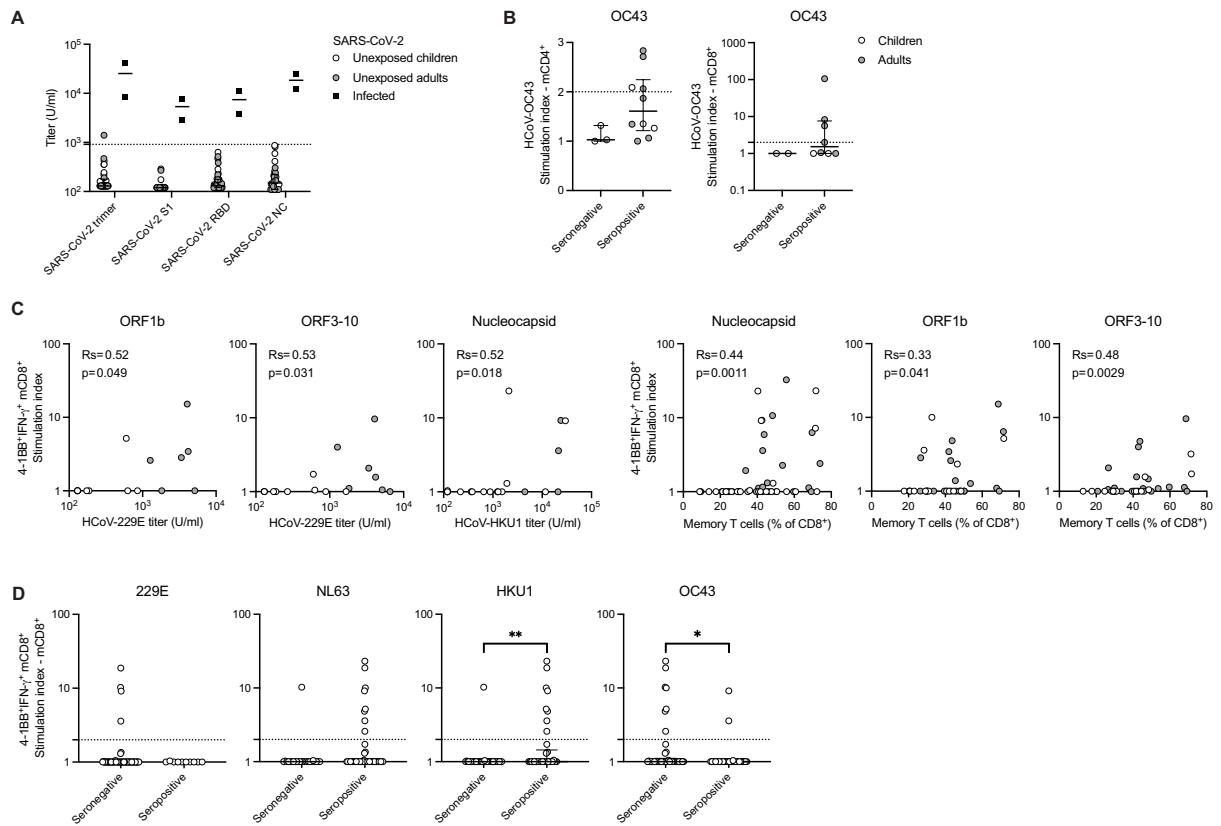

**Figure S5. Evaluation of SARS-CoV-2-specific mCD8<sup>+</sup> T cell responses and HCoV antibody titers in children and adults.**

(A) Titers for different SARS-CoV-2-spike-specific antibodies measured by ProcartaPlex assay in unexposed children (n=21), adults (n=12) or SARS-CoV-2 convalescent individuals (n=2). Dotted line represents threshold of seropositivity calculated based on SARS-CoV-2 spike trimer-specific antibody values in unexposed individuals (mean + (3 \* SD)). This threshold was applied to Ig measurements shown in Fig. 2D. (B) Stimulation indices for HCoV-OC43-specific mCD4<sup>+</sup> (left) and mCD8<sup>+</sup> (right) T cell responses in HCoV-OC43 seronegative or seropositive individuals. Dotted line represents stimulation index of 2. (C) Associations between 4-1BB<sup>+</sup>IFN- $\gamma$ <sup>+</sup> mCD8<sup>+</sup> T cell stimulation indices for the indicated SARS-CoV-2 antigens and indicated HCoV antibody titers (U/ml) or total mCD8<sup>+</sup> T cell frequencies with corresponding Spearman R and P values. (D) Stimulation indices for all SARS-CoV-2-specific mCD8<sup>+</sup> T cell responses in indicated HCoV-seronegative or -seropositive children. Dotted line represents stimulation index of 2. (A) S, spike; NC, nucleocapsid; RBD, receptor binding



domain. (A, B, D) Graphs show median  $\pm$  IQR. (C) Spearman correlations. (D) Mann-Whitney test. \* $P < 0.05$ ; \*\* $P < 0.01$ .



different individuals (n=2). **(D, E)** Expression profiles for CD69/CD103 (D) or CXCR5 (E) among SARS-CoV-2-reactive mCD8<sup>+</sup> T cells specific for the indicated antigens. **(F, G)** Representative plots showing expression of CD69/CD103 (F) or CXCR5 (G) among total (left) or SARS-CoV-2 spike-specific mCD8<sup>+</sup> T cells (right) from one individual. **(H, I)** Expression profiles for CD69/CD103 (H) or CXCR5 (I) among virus-specific mCD8<sup>+</sup> T cells from children or adults. (D, E) S, spike; NC, nucleocapsid; M+E, membrane+envelope. (C) Graphs show median. (D, E, H, I) Graphs show median  $\pm$  IQR. (D, E) Kruskal-Wallis test with Dunn's post-test. (H, I) Mann-Whitney test for comparisons between children and adults, Kruskal-Wallis test with Dunn's post-test for comparisons between antigens. \* $P < 0.05$ ; \*\* $P < 0.01$ ; \*\*\* $P < 0.001$ ; \*\*\*\* $P < 0.0001$ ; ns, not significant.

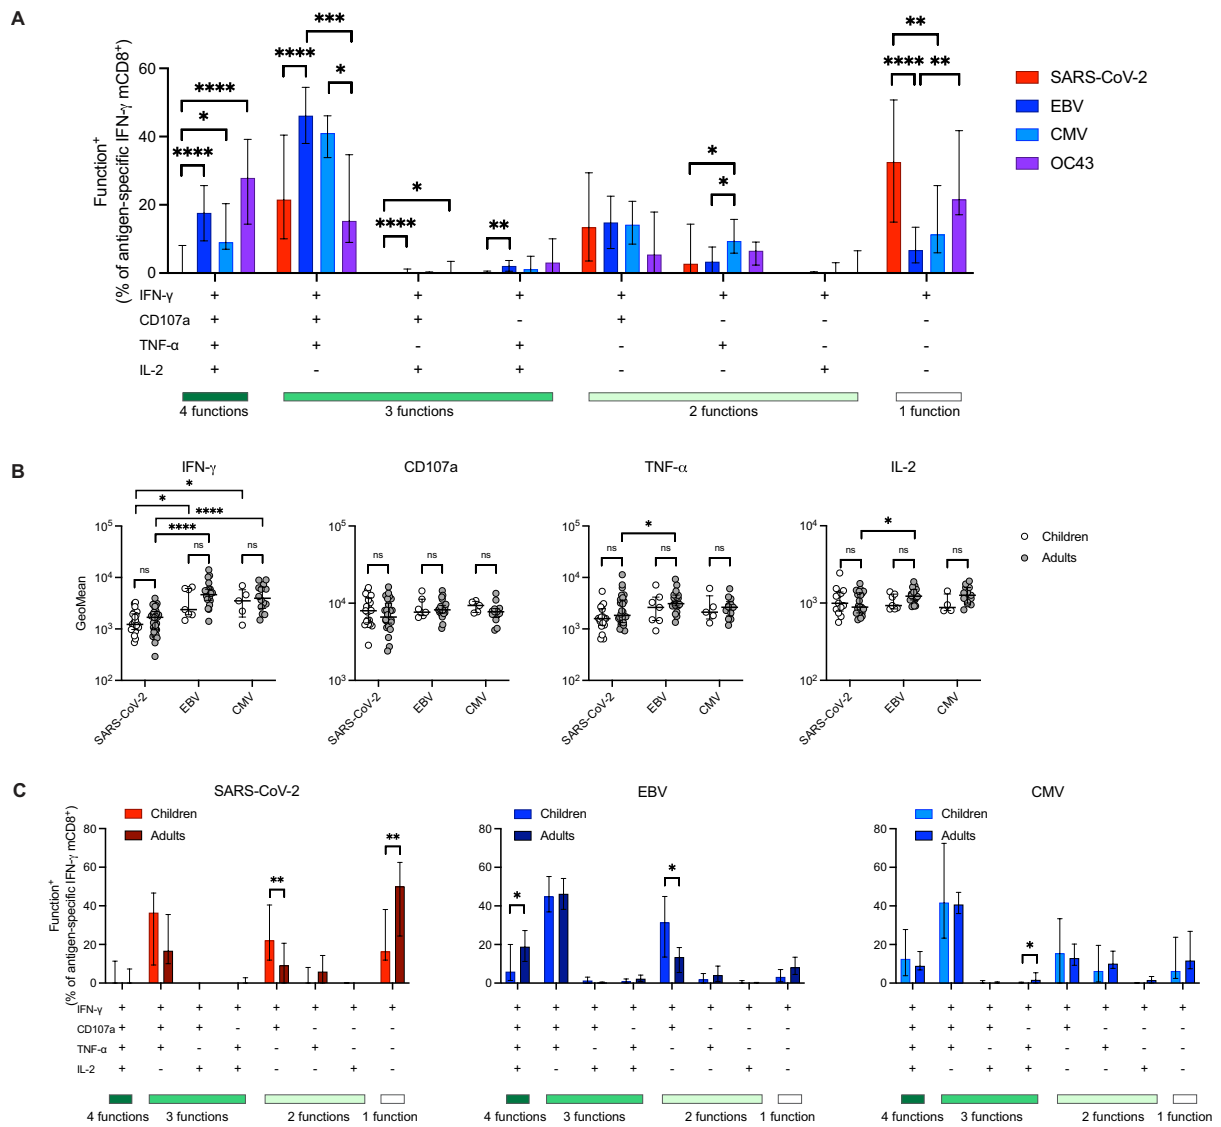

**Figure S7. Functional profiles of virus-specific tonsillar mCD8<sup>+</sup> T cells.**

(A) Coexpression of CD107a, TNF- $\alpha$ , and IL-2 among 4-1BB<sup>+</sup>IFN- $\gamma$ <sup>+</sup> virus-specific mCD8<sup>+</sup> T cells. (B) Geometric mean (GeoMean) fluorescence values for the same functions in children and adults. (C) Coexpression of CD107a, TNF- $\alpha$ , and IL-2 among 4-1BB<sup>+</sup>IFN- $\gamma$ <sup>+</sup> virus-specific mCD8<sup>+</sup> T cells from children or adults. (A-C) Graphs show show median  $\pm$  IQR. (A) Kruskal-Wallis test with Dunn's post-test. (B) Kruskal-Wallis test with Dunn's post-test for comparisons among virus specificities within each age group; Mann-Whitney test for comparisons between children and adults within virus specificities. (C) Mann-Whitney test. \* $P < 0.05$ ; \*\* $P < 0.01$ ; \*\*\* $P < 0.001$ ; \*\*\*\* $P < 0.0001$ ; ns, not significant.

**Table S1. Donor characteristics.**

| <b><i>Tonsil cohorts,<br/>SARS-CoV-2 unexposed</i></b> | <i>Children (n = 40)</i> | <i>Adults (n = 41)</i> |
|--------------------------------------------------------|--------------------------|------------------------|
| <i>Age<br/>(median [range], years)</i>                 | 3 [2–5]                  | 41 [28–67]             |
| <i>Sex<br/>(male, female)</i>                          | 23, 17                   | 37, 4                  |
| <i>Year of surgery</i>                                 | 2015–2016                | 2016–2018              |
| <b><i>SARS-CoV-2 convalescent</i></b> <i>n = 2</i>     |                          |                        |
| <i>Age<br/>(years)</i>                                 | 32, 35                   |                        |
| <i>Sex<br/>(male, female)</i>                          | 2, 0                     |                        |
| <i>Year of collection</i>                              | 2021                     |                        |

**Table S2. Seroprevalence for HCoV in children and adults**

|                  | <i>Seropositive children</i> |                   | <i>Seropositive adults</i> |                   |
|------------------|------------------------------|-------------------|----------------------------|-------------------|
|                  | <i>Number</i>                | <i>Percentage</i> | <i>Number</i>              | <i>Percentage</i> |
| <i>HCoV-229E</i> | 4/21                         | 19.1              | 12/12                      | 100               |
| <i>HCoV-NL63</i> | 13/21                        | 62.0              | 12/12                      | 100               |
| <i>HCoV-HKU1</i> | 9/21                         | 42.9              | 12/12                      | 100               |
| <i>HCoV-OC43</i> | 10/21                        | 47.6              | 12/12                      | 100               |
| <i>Any HCoV</i>  | 18/21                        | 85.7              | 12/12                      | 100               |

**Table S3. Associations between mCD8<sup>+</sup> T cell responses specific for SARS-CoV-2 and mCD8<sup>+</sup> T cell responses specific for EBV, CMV, or HCoV-OC43.**

| <b>Children</b> |            | <i>Neg</i> | <i>Pos</i> | <i>Total</i> | <i>P *</i> |
|-----------------|------------|------------|------------|--------------|------------|
| <i>EBV</i>      | <i>Neg</i> | 7          | 0          | 7            | 0.0047     |
|                 | <i>Pos</i> | 1          | 6          | 7            |            |
| <i>CMV</i>      | <i>Neg</i> | 6          | 1          | 7            | 0.2222     |
|                 | <i>Pos</i> | 2          | 3          | 5            |            |
| <i>OC43</i>     | <i>Neg</i> | 6          | 5          | 11           | NA         |
|                 | <i>Pos</i> | 0          | 0          | 0            |            |
| <b>Adults</b>   |            | <i>Neg</i> | <i>Pos</i> | <i>Total</i> | <i>P *</i> |
| <i>EBV</i>      | <i>Neg</i> | 2          | 0          | 2            | 0.4862     |
|                 | <i>Pos</i> | 11         | 10         | 21           |            |
| <i>CMV</i>      | <i>Neg</i> | 6          | 3          | 9            | 0.4149     |
|                 | <i>Pos</i> | 6          | 7          | 13           |            |
| <i>OC43</i>     | <i>Neg</i> | 8          | 4          | 12           | 0.1984     |
|                 | <i>Pos</i> | 3          | 6          | 9            |            |

\*Fisher's exact test. NA, not applicable.

**Table S4. Flow cytometry reagents and analysis software.**

|                                         | Reagent                                        | Catalog number | Source                   | RRID             |
|-----------------------------------------|------------------------------------------------|----------------|--------------------------|------------------|
| Antibodies                              | Anti-CCR4–BB700 (clone 1G1)                    | 566475         | BD Biosciences           | RRID:AB_2744302  |
|                                         | Anti-CCR6–BUV737 (clone 11A9)                  | 612780         | BD Biosciences           | RRID:AB_2870109  |
|                                         | Anti-CCR7–APC-Cy7 (clone G043H7)               | 353212         | BioLegend                | RRID:AB_10916390 |
|                                         | Anti-CD3–BUV805 (clone UCHT1)                  | 612895         | BD Biosciences           | RRID:AB_2870183  |
|                                         | Anti-CD3–BV605 (clone UCHT1)                   | 300460         | BioLegend                | RRID:AB_2564380  |
|                                         | Anti-CD4–BUV496 (clone SK3)                    | 612936         | BD Biosciences           | RRID:AB_2870220  |
|                                         | Anti-CD4–PE-Cy5.5 (clone S3.5)                 | MHCD0418       | Thermo Fisher Scientific | RRID:AB_10376013 |
|                                         | Anti-CD8–BUV395 (clone RPA-T8)                 | 563795         | BD Biosciences           | RRID:AB_2722501  |
|                                         | Anti-CD14–BV510 (clone M5E2)                   | 301842         | BioLegend                | RRID:AB_2561946  |
|                                         | Anti-CD19–BV510 (clone HIB19)                  | 302242         | BioLegend                | RRID:AB_2561668  |
|                                         | Anti-CD45RA–BV570 (clone HI100)                | 304132         | BioLegend                | RRID:AB_2563813  |
|                                         | Anti-CD49a–BUV615 (clone SR84)                 | 751437         | BD Biosciences           | RRID:AB_2875433  |
|                                         | Anti-CD69–BUV563 (clone FN50)                  | 748764         | BD Biosciences           | RRID:AB_2873167  |
|                                         | Anti-CD103–BV605 (clone Ber-ACT8)              | 350218         | BioLegend                | RRID:AB_2564283  |
|                                         | Anti-CD107a–BV785 (clone H4A3)                 | 328644         | BioLegend                | RRID:AB_2565967  |
|                                         | Anti-CD134–PE (clone Ber-ACT35)                | 350004         | BioLegend                | RRID:AB_10645478 |
|                                         | Anti-CD137–PE-Cy7 (clone 4B4-1)                | 309818         | BioLegend                | RRID:AB_2207741  |
|                                         | Anti-CD154–BV421 (clone 24-31)                 | 310824         | BioLegend                | RRID:AB_2562721  |
|                                         | Anti-CXCR3–BV750 (clone 1C6)                   | 746895         | BD Biosciences           | RRID:AB_2871692  |
|                                         | Anti-CXCR5–BB515 (clone RF8B2)                 | 564624         | BD Biosciences           | RRID:AB_2738871  |
|                                         | Anti-IFN- $\gamma$ –FITC (clone B27)           | 554700         | BD Biosciences           | RRID:AB_395517   |
|                                         | Anti-IFN- $\gamma$ –PE (clone B27)             | 506507         | BD Biosciences           | RRID:AB_315440   |
|                                         | Anti-IL-2–PE-Dazzle594 (clone MQ1-17H12)       | 500344         | BioLegend                | RRID:AB_2564091  |
|                                         | Anti-IL-17A–eFluor660 (clone eBio64CAP17)      | 50-7178-42     | Thermo Fisher Scientific | RRID:AB_2574282  |
|                                         | Anti-PD-1–BV711 (clone EH12.2H7)               | 329928         | BioLegend                | RRID:AB_2562911  |
|                                         | Anti-PD-L1–BV786 (clone 29E.2A3)               | 329735         | BioLegend                | RRID:AB_2629581  |
| Anti-TNF- $\alpha$ –BV650 (clone Mab11) | 502936                                         | BD Biosciences | RRID:AB_2563884          |                  |
| Other reagents                          | BD GolgiStop                                   | 554724         | BD Biosciences           | -                |
|                                         | Brefeldin A                                    | 420601         | BioLegend                | -                |
|                                         | Brilliant Stain Buffer Plus                    | 566385         | BD Biosciences           | RRID:AB_2869761  |
|                                         | Dasatinib                                      | 73082          | STEMCELL                 | -                |
|                                         | DNase I                                        | 4716728001     | Sigma-Aldrich            | -                |
|                                         | FoxP3 Transcription Factor Staining Buffer Set | 00-5523-00     | Thermo Fisher Scientific | -                |
|                                         | LIVE/DEAD Fixable Aqua Dead Cell Stain Kit     | L34957         | Thermo Fisher Scientific | -                |
|                                         | Paraformaldehyde                               | 22023          | Biotium                  | -                |
|                                         | Staphylococcal enterotoxin B (SEB)             | S4881          | Sigma-Aldrich            | -                |
| Software                                | FlowJo                                         | -              | FlowJo, LLC              | RRID:SCR_008520  |
|                                         | Prism                                          | -              | GraphPad Software Inc.   | RRID:SCR_002798  |
|                                         | Bioplex Manager                                | -              | Biorad                   | RRID:SCR_014330  |
